# Supplementary material for: A-Kinase Anchoring Protein 4 (AKAP4) is an ERK1/2 substrate and a switch molecule between cAMP/PKA and PKC/ERK1/2 in human spermatozoa
Source: PubMed Central journal article supplement (PMC5128789; doi:10.1038/srep37922), 2016-11-30
Supplement: srep37922-s1.pdf [file srep37922-s1.pdf]

**A-Kinase Anchoring Protein 4 (AKAP4) is an ERK1/2 substrate and a switch molecule between cAMP/PKA and PKC/ERK1/2 in human spermatozoa**

**Liat Rahamim Ben-Navi<sup>a,+</sup>, Tal Almog<sup>a,+</sup>, Zhong Yao<sup>b</sup>, Rony Seger<sup>b</sup>, Zvi Naor<sup>a,\*</sup>**

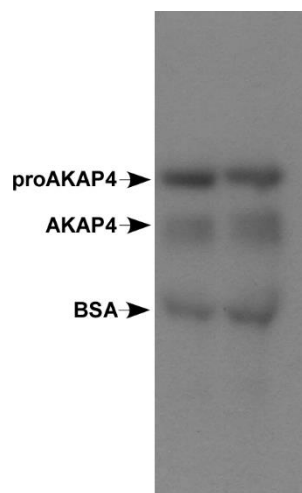

Figure S1. Specificity of the AKAP4 antibody. Human sperm were preincubated in capacitation medium. Cells were then lysed and analyzed for AKAP4 by western blotting using an antibody for AKAP4.
